# Supplementary material for: Enhancement of the initial hydrogenation of Mg by ball milling with alkali metal amides MNH2(M = Li or Na)
Source: Royal Society of Chemistry journal article supplement (doi:10.1039/c5dt01847a), 2015-01-01
Supplement: c5dt01847a1.pdf [file c5dt01847a1.pdf]

*Electronic Supplementary Information*

**Enhancement of initial hydrogenation of Mg by ball milling  
with alkali metal amides MNH<sub>2</sub> (M = Li or Na)**

Hailiang Chu,<sup>a,b</sup> Shujun Qiu,<sup>a,b</sup> Lixian Sun,<sup>a,b</sup> Jacques Huot<sup>c</sup>

<sup>a</sup> School of Materials Science and Engineering, Guilin University of Electronic  
Technology, No. 1, Jinji Road, Guilin 541004, PR China

<sup>b</sup> Guangxi Key Laboratory of Information Materials, Guilin University of Electronic  
Technology, No. 1, Jinji Road, Guilin 541004, PR China

<sup>c</sup> Hydrogen Research Institute, Université du Québec à Trois-Rivières, 3351 des  
Forges, Trois-Rivières, Québec G9A 5H7, Canada.

E-mail: [chuhailiang@guet.edu.cn](mailto:chuhailiang@guet.edu.cn); [jacques.huot@uqtr.ca](mailto:jacques.huot@uqtr.ca)

Tel.: +86-773-2216607; Fax: +86-773-2290129.

## Experimental details:

The starting materials Mg powder (99.8%, -325 mesh, Alfa Aesar), LiNH<sub>2</sub> (95%, Alfa Aesar), NaNH<sub>2</sub> (95%, Sigma Aldrich), MgH<sub>2</sub> (98%, Alfa Aesar), Li (99%, Sigma Aldrich), NaCl (95%, Fluka), and NaBr (99%, Alfa Aesar) were all used as received. The samples were prepared by ball milling a 2 g mixture of Mg and MNH<sub>2</sub> (4 wt%, M = Li and Na) in a Spex 8000 mill. For comparison, a mixture of Mg and 4 wt% of MgH<sub>2</sub>, Li, NaCl, or NaBr was ball milled under the same conditions. The ball-to-powder weight ratio was 7.5:1 and the milling time was fixed at 30 min due to the ductile nature of Mg. Milling was performed in stainless steel vials with three hardened steel balls under argon ambient atmosphere. The samples were handled inside a glove box filled with argon atmosphere to avoid excessive oxidation of the powders.

The crystal structure was studied by X-ray diffraction (XRD) using Bruker D8 Focus X-ray apparatus with Cu K $\alpha$  radiation. Phase abundance, crystallite size and microstrain were determined from Rietveld analysis using TOPAS software [S1]. The powder's morphology was characterized by scanning electron microscopy (SEM) using a JEOL JSM-5500 microscope. The microscope was equipped with energy dispersive X-ray spectroscopy (EDX) (Oxford Instruments), which allowed for the determination of elemental composition. The samples were prepared by pressing the powder into a pellet under 30 MPa of pressure.

The hydrogen sorption properties were measured with a homemade Sieverts-type apparatus. All measurements were performed at 573 or 608 K under a hydrogen pressure of 2 MPa for absorption and 0.05 MPa for desorption. Each sample was loaded in the reactor inside a glove box. Prior to measurement the system was heated under dynamic vacuum at the absorption temperature in order to remove the gaseous products like ammonia from decomposition of alkali metal amides.

## Figures and Tables

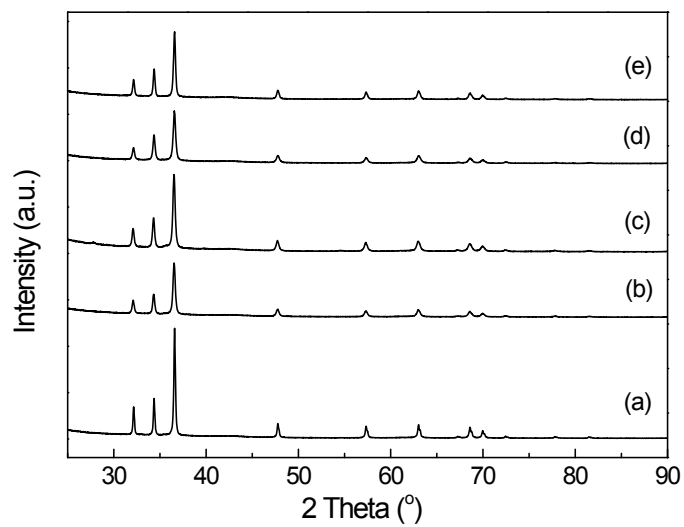

**Fig. S1** XRD patterns of (a) as-received Mg, ball milled (b) Mg, (c) Mg-MgH<sub>2</sub>, (d) Mg-LiNH<sub>2</sub> and (e) Mg-NaNH<sub>2</sub>.

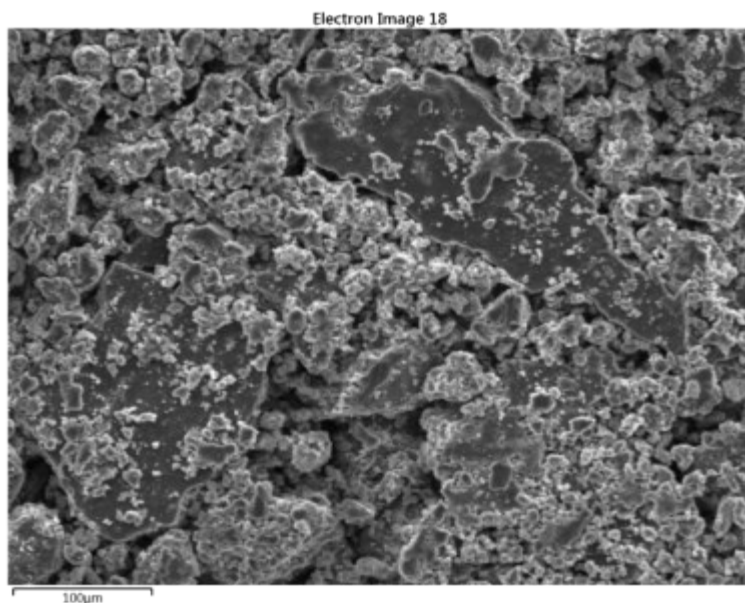

(a)

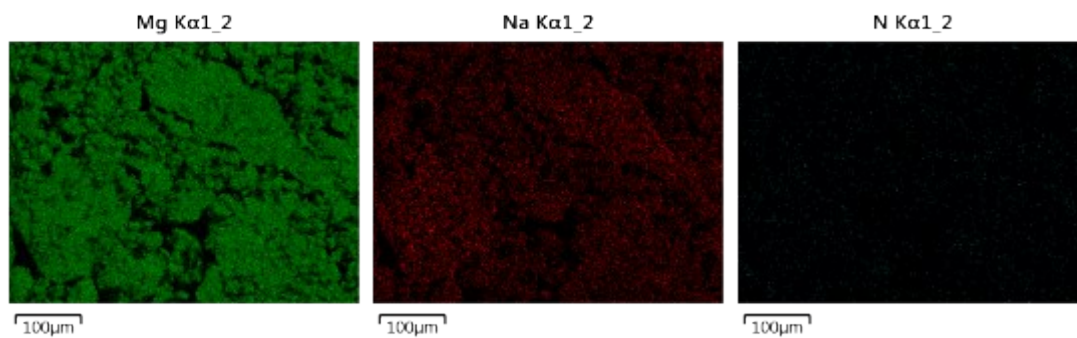

(b)

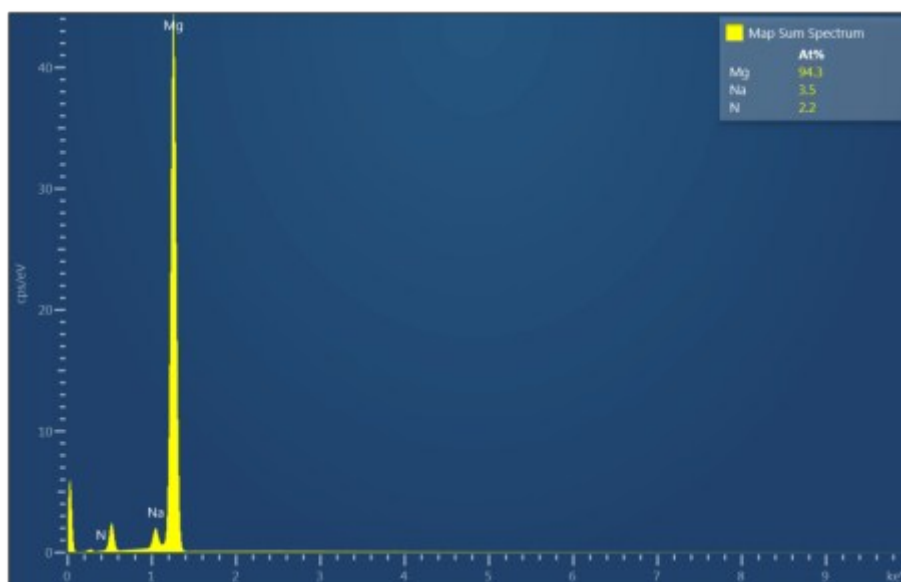

(c)

**Fig. S2** (a) SEM image and (b) EDX elemental mappings of Mg-NaNH<sub>2</sub>. Image (b) is corresponding to image (a). (c) The amount of elements.

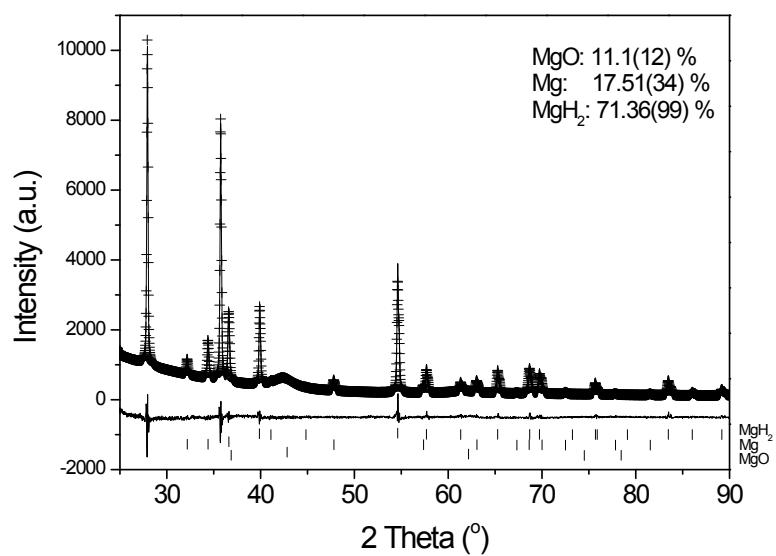

**Fig. S3.** XRD pattern and Rietveld refinement result of Mg-NaNH<sub>2</sub> after hydrogen absorption ( $R_{wp} = 8.87\%$ ).

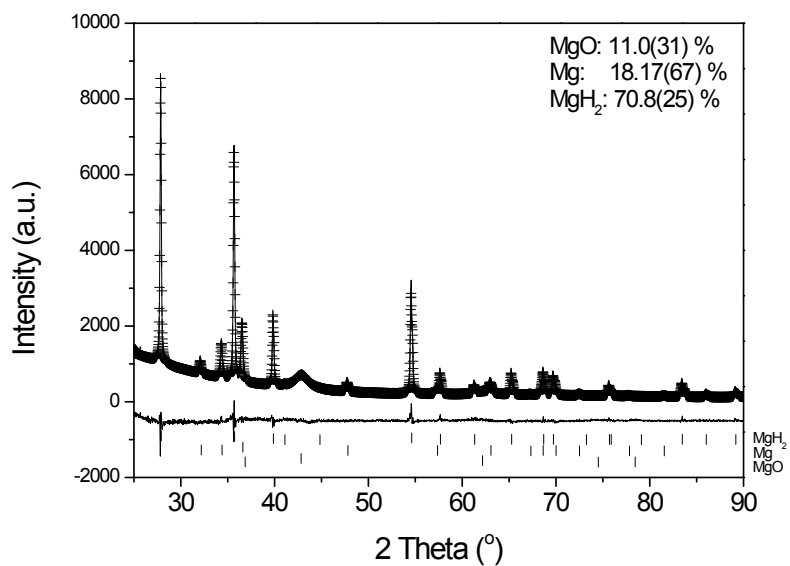

**Fig. S4.** XRD pattern and Rietveld refinement result of Mg-LiNH<sub>2</sub> after hydrogen absorption ( $R_{wp} = 7.19\%$ ).

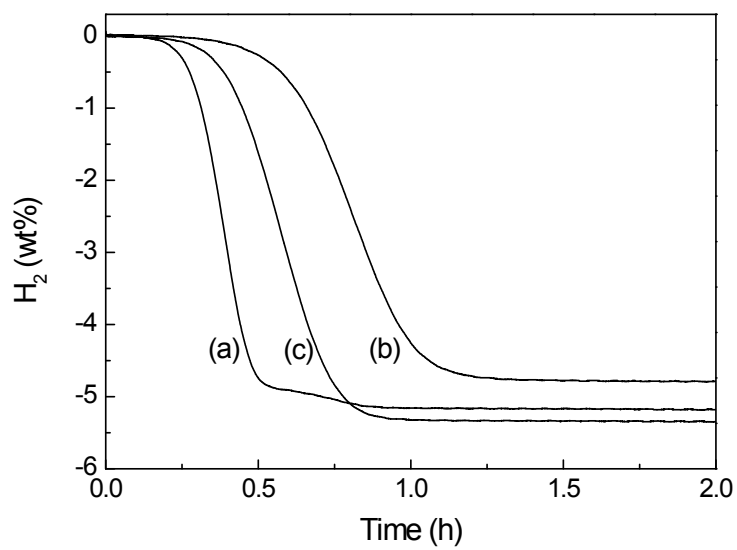

**Fig. S5** Hydrogen desorption kinetic curves at 608 K under 0.05 MPa H<sub>2</sub> pressure for ball milled (a) Mg; (b) Mg-LiNH<sub>2</sub> and (c) Mg-NaNH<sub>2</sub>.

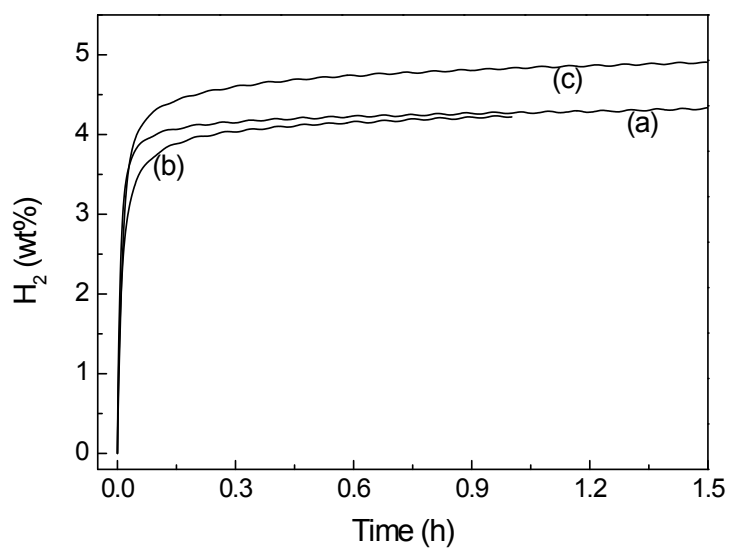

**Fig. S6.** Second (after initial activation) hydrogen absorption kinetic curves at 608 K under 2 MPa H<sub>2</sub> pressure for ball milled (a) Mg; (b) Mg-LiNH<sub>2</sub> and (c) Mg-NaNH<sub>2</sub>.



Table S1

Crystallite size, microstrain and phase abundances of the Mg, MgH<sub>2</sub> phases in wt% determined from Rietveld refinement of all the samples. For crystallite size and microstrain values in parenthesis are uncertainties on the last significant digit.

| Samples                                 | Mg        |            | MgH <sub>2</sub> |            | Parameters of fit  |
|-----------------------------------------|-----------|------------|------------------|------------|--------------------|
|                                         | Size (nm) | Strain (%) | Size (nm)        | Strain (%) |                    |
| As-received Mg                          | 55.7(4)   | 0.155(6)   |                  |            | $R_{wp} = 10.09\%$ |
| Mg-BM                                   | 41.7(7)   | 0.449(9)   |                  |            | $R_{wp} = 6.83\%$  |
| Mg-BM-120 min                           | 33.7 (6)  | 0.531(1)   |                  |            | $R_{wp} = 6.95\%$  |
| Mg-LiNH <sub>2</sub> -BM                | 37.4(6)   | 0.479(9)   |                  |            | $R_{wp} = 6.73\%$  |
| Mg-NaNH <sub>2</sub> -BM                | 55.1(1)   | 0.395(8)   |                  |            | $R_{wp} = 7.53\%$  |
| Mg-LiNH <sub>2</sub> -BM-Heated for 1 h | 42.6(1)   | 0.413(1)   |                  |            | $R_{wp} = 7.32\%$  |
| Mg-NaNH <sub>2</sub> -BM-Heated for 1 h | 82.0(2)   | 0.292(8)   |                  |            | $R_{wp} = 7.71\%$  |
| Mg-LiNH <sub>2</sub> -BM-Absorption     | 41.6(2)   | 0.279(4)   | 69.9(1)          | 0.158(7)   | $R_{wp} = 7.19\%$  |
| Mg-NaNH <sub>2</sub> -BM-Absorption     | 49.8(4)   | 0.347(4)   | 70.8(1)          | 0.162(7)   | $R_{wp} = 8.87\%$  |
| Mg-MgH <sub>2</sub> -BM-Absorption      | 63.8(3)   | 0.338(2)   | 69.7(1)          | 0.239(7)   | $R_{wp} = 6.43\%$  |
| Mg-LiNH <sub>2</sub> -BM-Desorption     | 74.8(2)   | 0.258(9)   |                  |            | $R_{wp} = 9.31\%$  |
| Mg-NaNH <sub>2</sub> -BM-Desorption     | 82.7(2)   | 0.256(8)   |                  |            | $R_{wp} = 8.56\%$  |

Reference:

[S1] BRUKER AXS, TOPAS V4: General Profile and Structure Analysis Software for Powder Diffraction Data, Bruker AXS, Karlsruhe, Germany, 2008.
